# Supplementary material for: Characteristics of non-conveyed patients in emergency medical services (EMS): a one-year prospective descriptive and comparative study in a region of Sweden
Source: PubMed Central journal article supplement (PMC7418316; doi:10.1186/s12873-020-00353-8), 2020-08-10
Supplement: 12873_2020_353_MOESM1_ESM.pdf [file 12873_2020_353_MOESM1_ESM.pdf]

**Cognitive impairment was considered present for the following conditions;**

- Drugs/alcohol with clear impact
- Head trauma with signs of concussion
- Severe psychiatric disorder, e.g. psychosis
- Neuropsychiatric functional impairment

**Lacking decision-making ability;**

- GCS <15, disorientated, cannot account for what has happened or follow instructions.

**Is there a history suggestive of acute illness or acute deterioration of chronic disease?**

- Affected vital signs >Green, or exclusion criteria >Yellow (>Green for children <18 years)
- Pain VAS >3
- Fever >38,5°C and decreased general condition.
- Suicidal

**Required during transport;**

- drug administration is needed
- monitoring of vital signs is needed
- medical or nursing care is needed

**The ambulance nurse/s feels uncertainty performing the decision to non-convey the patient.**
